# Supplementary material for: Activities concentration of radiocesium in wild mushroom collected in Ukraine 30 years after the Chernobyl power plant accident
Source: PeerJ. 2018 Jan 5;6:e4222. doi: 10.7717/peerj.4222 (PMC5757420; doi:10.7717/peerj.4222)
Supplement: Supplemental Information 1 [file peerj-06-4222-s001.xlsx]

## Sheet: data
N	Type	Weight(g)	zone	Place	dry-weight(kg)	Cs137(D-Bq/kg)	Detection limit	Cs137(Bq/kg) law	Japan-µSv	R-uSv	µSv per day
1	1	208	2	L1	0.016	12112	29.313	931.692	76.0391	60.56	0.208326
2	1	206	3	L2	0.017	3977.19	22.8787	328.215	26.7869	21.334	0.0733888
3	1	202	4	L3	0.017	6825.75	24.59	574.445	46.8827	37.3389	0.128446
4	2	200	2	K1	0.02	1878.46	17.897	187.846	15.3308	12.21	0.0420023
5	2	206	3	K2	0.019	2482.68	20.0795	228.985	18.6884	14.8841	0.0512011
6	3	200	2	K1	0.015	4008.83	22.8212	300.662	24.5383	19.5431	0.0672281
7	3	208	3	K2	0.016	3285.58	20.6319	252.737	20.6269	16.4279	0.056512
8	3	200	4	K3	0.019	325.991	15.6596	30.9692	2.52752	2.013	0.00692471
9	1	204	2	L1	0.018	12586.5	33.4016	1110.57	90.6382	72.1872	0.248324
10	1	200	3	L2	0.017	14030.9	28.3896	1192.63	97.3349	77.5207	0.266671
11	1	211	4	L3	0.019	11213.5	24.2735	1009.74	82.4092	65.6333	0.225779
12	2	203	3	K2	0.019	3624.66	18.6886	339.254	27.6878	22.0515	0.0758571
13	2	201	4	K3	0.018	3191.08	19.0383	285.769	23.3227	18.575	0.0638979
14	2	209	2	K1	0.02	2694.29	19.5449	257.827	21.0423	16.7587	0.05765
15	3	202	4	K3	0.018	2080.93	20.8041	185.429	15.1336	12.0529	0.041462
16	3	206	2	K1	0.016	3992.81	22.8597	310.121	25.3102	20.1579	0.069343
17	3	201	3	K2	0.018	270.908	18.4864	24.2604	1.97999	1.57693	0.00542463
18	1	201	2	L1	0.018	6235.46	18.6485	558.399	45.5732	36.296	0.124858
19	1	205	2	L1	0.017	5728.06	19.71	475.01	38.7675	30.8757	0.106212
20	1	215	3	K2	0.017	16678.4	29.661	1318.76	107.629	85.7194	0.294875
21	1	204	3	K2	0.018	12873.8	24.5274	1135.93	92.7076	73.8353	0.253993
22	1	210	4	K3	0.015	24989.7	33.2216	1784.98	145.679	116.023	0.399121
23	1	209	4	K3	0.018	8222.58	21.585	708.165	57.7962	46.0307	0.158346
24	2	207	2	L1	0.018	4353.58	22.7838	378.572	30.8968	24.6072	0.0846487
25	2	202	2	L1	0.017	3672.8	19.2866	309.097	25.2266	20.0913	0.069114
26	2	205	2	L1	0.018	2321.96	17.4098	203.879	16.6394	13.2522	0.0455874
27	2	202	3	L2	0.018	5279.74	24.3972	470.472	38.3971	30.5807	0.105198
28	2	206	3	L2	0.017	1735.85	22.5161	143.249	11.6912	9.31121	0.0320306
29	2	209	3	L2	0.018	5051.41	25.8577	435.049	35.5061	28.2782	0.0972771
30	1	230	2	K1	0.017	9066.72	28.4526	670.149	54.6935	43.5597	0.149845
31	1	209	2	K1	0.016	16397.5	31.8009	1255.31	102.451	81.5952	0.280687
32	1	200	3	K2	0.016	10750.1	29.3481	860.011	70.189	55.9007	0.192299
33	1	205	3	K2	0.017	7177.63	20.84	595.218	48.5781	38.6892	0.133091
34	1	198	2	L1	0.018	11845.2	30.07	1076.83	87.8847	69.9942	0.24078
35	1	210	2	L1	0.02	777	16.1	74	6.03944	4.81	0.0165464
36	1	203	2	L1	0.019	3735.74	21.38	349.651	28.5364	22.7273	0.0781819
37	1	211	2	L1	0.019	2221.93	20.99	200.079	16.3292	13.0051	0.0447377
38	1	210	3	L2	0.019	1290.36	18.76	116.747	9.52818	7.58855	0.0261046
39	1	202	3	L2	0.018	1148.39	19.55	102.332	8.35171	6.65157	0.0228814
40	1	200	3	L2	0.016	609.97	63.8	48.7976	3.98257	3.17184	0.0109111
41	1	203	3	L2	0.019	1515.04	39.16	141.802	11.573	9.21712	0.0317069
42	1	204	3	L2	0.019	3144.56	18.19	292.876	23.9028	19.0369	0.065487
43	2	206	2	L2	0.018	2382.82	28.54	208.208	16.9927	13.5335	0.0465552
44	1	201	4	L3	0.018	2335.88	61.93	209.183	17.0723	13.5969	0.0467734
45	2	202	2	L2	0.016	2332.38	29.52	184.743	15.0776	12.0083	0.0413085
46	1	204	4	L3	0.019	300.04	46.21	27.9449	2.2807	1.81642	0.00624848
47	2	207	2	L2	0.017	3582.96	30.19	294.253	24.0151	19.1264	0.0657949
48	1	201	4	L3	0.019	1326.76	51.38	125.415	10.2356	8.15198	0.0280428
49	2	206	2	L2	0.018	2577.74	28.63	225.239	18.3827	14.6406	0.0503635
50	1	207	4	L3	0.015	5966.74	156.6	432.372	35.2876	28.1042	0.0966785
51	2	203	2	L2	0.017	2456.78	28.71	205.74	16.7913	13.3731	0.0460035
52	1	205	4	L3	0.018	3017.24	35.68	264.928	21.6219	17.2203	0.059238
53	2	201	2	L2	0.017	2433.98	25.02	205.859	16.801	13.3808	0.0460301
54	1	201	4	L3	0.019	672.67	24.23	63.5857	5.18949	4.13307	0.0142178
55	1	207	2	K1	0.012	18351.4	52.05	1063.85	86.825	69.1502	0.237877
56	3	204	3	L2	0.015	1990.65	29.93	146.371	11.9459	9.51414	0.0327286
57	1	204	2	K1	0.017	17607.1	44.84	1467.26	119.749	95.3716	0.328078
58	2	201	2	L3	0.017	2936.17	31.24	248.333	20.2674	16.1416	0.0555272
59	3	207	3	l2	0.017	1634.7	30.78	134.251	10.9567	8.7263	0.0300185
60	1	200	4	K3	0.015	9061.84	35.49	679.638	55.468	44.1765	0.151967
61	2	202	4	L3	0.017	4297.28	31.89	361.652	29.5159	23.5074	0.0808654
62	3	200	3	L2	0.016	5277.11	25.64	422.169	34.4549	27.441	0.0943969
63	1	209	3	K2	0.015	22042	47.2	1581.96	129.11	102.827	0.353726
64	2	207	4	L3	0.017	3042.9	29.12	249.9	20.3953	16.2435	0.0558776
65	2	209	4	K3	0.016	5534.44	33.88	423.689	34.579	27.5398	0.0947369
66	1	207	2	K1	0.017	22388.1	47.02	1838.64	150.058	119.511	0.411119
67	3	208	3	L2	0.019	6922.27	30.1	632.323	51.6064	41.101	0.141387
68	2	204	4	K2	0.015	3387.95	36.7	249.114	20.3312	16.1924	0.0557019
69	2	212	2	L1	0.019	330.45	29.8	29.6158	2.41706	1.92503	0.00662209
70	2	205	4	L3	0.017	3690.84	33.3	306.07	24.9796	19.8945	0.0684372
71	2	199	4	K3	0.015	6391.05	32.8	481.737	39.3165	31.3129	0.107716
72	3	201	3	L2	0.018	3104.98	29.32	278.058	22.6934	18.0738	0.0621737
73	2	200	2	L1	0.015	201	34.34	15.075	1.23033	0.979875	0.00337077
74	3	219	3	L2	0.019	2986.83	25.83	259.131	21.1487	16.8435	0.0579418
75	3	204	4	L3	0.018	13206.6	38.47	1165.29	95.1041	75.7439	0.260559
76	3	206	3	L2	0.018	2664.35	28.31	232.807	19.0003	15.1325	0.0520557
77	2	210	2	L1	0.08	284.14	25.58	108.244	8.83421	7.03585	0.0242033
78	2	200	4	L3	0.017	2468.72	31.49	209.841	17.126	13.6397	0.0469205
79	2	204	2	K1	0.018	485.59	30.07	42.8462	3.49685	2.785	0.00958041
80	3	200	4	L3	0.017	13164.8	45.31	1119.01	91.3269	72.7357	0.250211
81	3	213	3	L2	0.018	3582.15	30.55	302.717	24.7059	19.6766	0.0676875
82	2	200	2	K1	0.015	359.25	31.52	26.9437	2.19899	1.75134	0.00602462
83	2	204	3	K2	0.016	4509.99	32.66	353.725	28.8689	22.9921	0.0790928
84	2	207	2	K1	0.018	306.13	29.2	26.62	2.17256	1.7303	0.00595223
85	3	208	4	L3	0.018	4614.17	35.11	399.303	32.5887	25.9547	0.0892842
86	2	201	3	K2	0.017	4811.45	31.22	406.939	33.2119	26.451	0.0909915
87	2	209	4	K3	0.019	2909.54	27.81	264.504	21.5872	17.1927	0.059143
88	2	202	3	K2	0.016	3309.86	30.5	262.167	21.3965	17.0409	0.0586206
89	2	203	2	K1	0.013	297.05	40.66	19.0229	1.55254	1.23649	0.00425352
90	2	201	4	K3	0.017	5379.4	29.95	454.974	37.1323	29.5733	0.101732
91	2	207	4	K3	0.018	3378.86	26.31	293.814	23.9793	19.0979	0.0656968
92	2	200	3	K2	0.017	3135.7	29.55	266.534	21.7529	17.3247	0.0595971
93	3	203	4	K3	0.018	8052.34	26.04	714.001	58.2724	46.41	0.159651
94	2	202	2	L1	0.017	2307.97	30.62	194.235	15.8523	12.6253	0.043431
95	3	207	4	L2	0.016	12306.1	38.97	951.198	77.631	61.8278	0.212688
96	3	200	4	L3	0.018	4439.04	31.8	399.514	32.6059	25.9684	0.0893312
97	2	205	2	K1	0.019	264.06	25.85	24.4739	1.99741	1.5908	0.00547235
98	3	200	2	K2	0.018	2240.45	19.7	201.64	16.4567	13.1066	0.0450868
99	3	204	4	K3	0.017	3508.4	22.65	292.367	23.8612	19.0038	0.0653732
100	2	208	2	L1	0.017	1862.88	25.49	152.255	12.4261	9.89655	0.0340441
101	3	201	4	L2	0.017	5243.75	34	443.501	36.1959	28.8276	0.0991669
102	3	206	4	L3	0.018	13265.9	39.34	1159.16	94.6036	75.3453	0.259188
103	3	210	2	K1	0.02	3746.66	26.94	356.825	29.1219	23.1936	0.079786
104	3	201	2	K2	0.018	3276.03	21.12	293.376	23.9436	19.0694	0.0655988
105	3	197	4	K3	0.017	1703.8	18.69	147.028	11.9996	9.55685	0.0328756
106	3	220	2	L1	0.019	213.43	25.65	18.4326	1.50436	1.19812	0.00412153
107	3	207	3	L2	0.018	5233.75	28.32	455.109	37.1432	29.5821	0.101762
108	3	214	2	K1	0.019	6339.51	33.11	562.854	45.9367	36.5855	0.125854
109	3	209	3	K2	0.018	2190.77	20.21	188.679	15.3988	12.2641	0.0421886
110	3	210	4	K3	0.019	2455.09	18.32	222.127	18.1287	14.4383	0.0496676
111	3	200	2	L1	0.019	3624.41	35.17	344.319	28.1012	22.3807	0.0769897
112	3	204	4	L2	0.017	2931.86	30.65	244.322	19.9401	15.8809	0.0546303
113	3	202	2	K1	0.015	3574.87	29.58	265.461	21.6653	17.2549	0.059357
114	3	207	3	K2	0.018	7543.34	22.6	655.943	53.5341	42.6363	0.146669
115	3	200	4	K3	0.015	371.86	21.16	27.8895	2.27617	1.81282	0.00623609
116	3	200	2	L1	0.017	254.22	29.8	21.6087	1.76357	1.40457	0.00483171
117	3	218	2	K1	0.019	7397.41	31.32	644.728	52.6189	41.9073	0.144161
118	3	202	3	k2	0.018	6534.27	23.18	582.262	47.5207	37.847	0.130194
119	3	200	4	k3	0.017	2475.53	22.5	210.42	17.1732	13.6773	0.0470499
120	3	201	2	L1	0.017	16914.8	31.44	1430.61	116.758	92.9896	0.319884
121	3	202	2	K1	0.018	2797.26	26.19	249.261	20.3432	16.202	0.0557347
122	3	203	3	K2	0.017	3761.65	21.95	315.015	25.7096	20.476	0.0704374
123	3	205	2	L1	0.017	256.95	24.15	21.308	1.73904	1.38502	0.00476448
124	3	219	2	K1	0.019	1954.42	23.66	169.562	13.8386	11.0215	0.037914
125	3	208	3	K2	0.017	3875.64	22.69	316.759	25.852	20.5893	0.0708273
126	3	204	2	K1	0.016	3225.43	18.14	252.975	20.6463	16.4434	0.0565652
127	3	208	3	K2	0.017	15583.7	32.2	1273.67	103.949	82.7884	0.284792
